# Supplementary material for: Global Spread of Mutant PfCRT and Its Pleiotropic Impact on Plasmodium falciparum Multidrug Resistance and Fitness
Source: PubMed Central journal article supplement (PMC6495381; doi:10.1128/mbio.02731-18), 2019-04-30
Supplement: mBio.02731-18-st001.pdf [file mBio.02731-18-st001.pdf]

**Supplementary Table S1.** Frequency distribution of PfCRT haplotypes from the Pf3K dataset across Africa.

| Isoform             | # of variants | No. of isolates |        | DR of the Congo |       | Ghana |       | Guinea |       | Malawi |        | Mali |       | Nigeria |       | Senegal |       | The Gambia |       |
|---------------------|---------------|-----------------|--------|-----------------|-------|-------|-------|--------|-------|--------|--------|------|-------|---------|-------|---------|-------|------------|-------|
|                     |               | Total           | %      | %               | %     | %     | %     | %      | %     | %      | %      | %    | %     | %       | %     | %       | %     |            |       |
| 3D7 (wild-type)     | 0             | 513             | 65.5%  | 6               | 11.5% | 285   | 78.3% | 10     | 15.2% | 147    | 100.0% | 9    | 27.3% | -       | -     | 48      | 67.6% | 8          | 17.0% |
| Dd2                 | 8             | -               | -      | -               | -     | -     | -     | -      | -     | -      | -      | -    | -     | -       | -     | -       | -     | -          | -     |
| GB4                 | 6             | 146             | 18.6%  | 24              | 46.2% | 63    | 17.3% | 39     | 59.1% | -      | -      | 10   | 30.3% | 2       | 66.7% | 7       | 9.9%  | 1          | 2.1%  |
| Cam734              | 9             | -               | -      | -               | -     | -     | -     | -      | -     | -      | -      | -    | -     | -       | -     | -       | -     | -          | -     |
| Cam783              | 7             | 90              | 11.5%  | 18              | 34.6% | 5     | 1.4%  | 14     | 21.2% | -      | -      | 8    | 24.2% | 1       | 33.3% | 7       | 9.9%  | 37         | 78.7% |
| FCB                 | 7             | 4               | 0.5%   | -               | -     | -     | -     | -      | -     | -      | -      | -    | -     | -       | -     | 3       | 4.2%  | 1          | 2.1%  |
| Other haplotypes    |               | 30              | 3.8%   | 4               | 7.7%  | 11    | 3.0%  | 3      | 4.5%  | -      | -      | 6    | 18.2% | -       | -     | 6       | 8.5%  | -          | -     |
| Total               |               | 783             | 100.0% | 52              |       | 364   |       | 66     |       | 147    |        | 33   |       | 3       |       | 71      |       | 47         |       |
| Percentage of total |               |                 |        | 6.6%            |       | 46.5% |       | 8.4%   |       | 18.8%  |        | 4.2% |       | 0.4%    |       | 9.1%    |       | 6.0%       |       |

Samples were collected from the Pf3K data version 3 (totaling 783 genomes that passed our analysis). A dash indicates that the allele was not observed in any genomes from that country.
