# Supplementary material for: Global Spread of Mutant PfCRT and Its Pleiotropic Impact on Plasmodium falciparum Multidrug Resistance and Fitness
Source: PubMed Central journal article supplement (PMC6495381; doi:10.1128/mbio.02731-18), 2019-04-30
Supplement: mBio.02731-18-st002.pdf [file mBio.02731-18-st002.pdf]

**Supplementary Table S2.** Frequency distribution of PfCRT haplotypes from the Pf3K dataset across Asia.

| Isoform             | # of variants | No. of isolates |        | Cambodia |       | Laos |       | Myanmar |       | Thailand |       | Vietnam |       | Bangladesh |       |
|---------------------|---------------|-----------------|--------|----------|-------|------|-------|---------|-------|----------|-------|---------|-------|------------|-------|
|                     |               | Total           | %      |          | %     |      | %     |         | %     |          | %     |         | %     |            | %     |
| 3D7 (wild-type)     | 0             | 5               | 0.6%   | 4        | 0.9%  | -    | -     | -       | -     | -        | -     | 1       | 1.3%  | -          | -     |
| Dd2                 | 8             | 484             | 60.0%  | 252      | 55.4% | 11   | 16.9% | 50      | 98.0% | 122      | 96.1% | 37      | 48.1% | 12         | 38.7% |
| GB4                 | 6             | 99              | 12.3%  | 64       | 14.1% | 27   | 41.5% | -       | -     | -        | -     | 8       | 10.4% | -          | -     |
| Cam734              | 9             | 121             | 15.0%  | 69       | 15.2% | 25   | 38.5% | -       | -     | -        | -     | 27      | 35.1% | -          | -     |
| Cam783              | 7             | 20              | 2.5%   | -        | -     | -    | -     | -       | -     | -        | -     | 1       | 1.3%  | 19         | 61.3% |
| FCB                 | 7             | 2               | 0.2%   | -        | -     | -    | -     | 1       | 2.0%  | 1        | 0.8%  | -       | -     | -          | -     |
| Other haplotypes    |               | 75              | 9.3%   | 66       | 14.5% | 2    | 3.1%  | -       | -     | 4        | 3.1%  | 3       | 3.9%  | -          | -     |
| Total               |               | 806             | 100.0% | 455      |       | 65   |       | 51      |       | 127      |       | 77      |       | 31         |       |
| Percentage of total |               |                 |        | 56.5%    |       | 8.1% |       | 6.3%    |       | 15.8%    |       | 9.6%    |       | 3.8%       |       |

Samples were collected from the Pf3K data version 3 and Cambodian genomes collected in 2012 and 2013 that were more recently deposited by the Pf3K consortium totalling 806 genomes that passed our analysis. A dash indicates that the allele was not observed in any genomes from that country.
