# Supplementary material for: Global Spread of Mutant PfCRT and Its Pleiotropic Impact on Plasmodium falciparum Multidrug Resistance and Fitness
Source: PubMed Central journal article supplement (PMC6495381; doi:10.1128/mbio.02731-18), 2019-04-30
Supplement: mBio.02731-18-st003.pdf [file mBio.02731-18-st003.pdf]

**Supplementary Table S3.** PfCRT haplotype distribution across Asia and Africa, as derived from the Pf3K dataset.

| Haplotype                 | PfCRT Haplotype                                    | No. variants | No. of isolates |        | Asia (per country sampled) |      |         |          |         |            | Africa (per country sampled) |       |        |        |      |         |         |            |
|---------------------------|----------------------------------------------------|--------------|-----------------|--------|----------------------------|------|---------|----------|---------|------------|------------------------------|-------|--------|--------|------|---------|---------|------------|
|                           |                                                    |              | ASIA            | AFRICA | Cambodia                   | Laos | Myanmar | Thailand | Vietnam | Bangladesh | DR Congo                     | Ghana | Guinea | Malawi | Mali | Nigeria | Senegal | The Gambia |
| 3D7 (wild-type)           | 3D7 (wild-type)                                    | -            | 5               | 513    | 4                          | -    | -       | -        | 1       | -          | 6                            | 285   | 10     | 147    | 9    | -       | 48      | 8          |
| Dd2                       | M74I;N75E;K76T;A220S;Q271E;N326S;I356T;R371I       | 8            | 484             | -      | 252                        | 11   | 50      | 122      | 37      | 12         | -                            | -     | -      | -      | -    | -       | -       | -          |
| GB4                       | M74I;N75E;K76T;A220S;Q271E;R371I                   | 6            | 99              | 146    | 64                         | 27   | -       | -        | 8       | -          | 24                           | 63    | 39     | -      | 10   | 2       | 7       | 1          |
| Cam734                    | M74I;N75D;K76T;A144F;L148I;I194T;A220S;Q271E;T333S | 9            | 121             | -      | 69                         | 25   | -       | -        | 27      | -          | -                            | -     | -      | -      | -    | -       | -       | -          |
| Cam783                    | M74I;N75E;K76T;A220S;Q271E;I356T;R371I             | 7            | 20              | 90     | -                          | -    | -       | -        | 1       | 19         | 18                           | 5     | 14     | -      | 8    | 1       | 7       | 37         |
| FCB                       | M74I;N75E;K76T;A220S;Q271E;N326S;R371I             | 7            | 2               | 4      | -                          | -    | 1       | 1        | -       | -          | -                            | -     | -      | -      | -    | -       | 3       | 1          |
| Cam738                    | M74I;N75D;K76T;L148I;I194T;A220S;Q271E;T333S       | 8            | -               | -      | -                          | -    | -       | -        | -       | -          | -                            | -     | -      | -      | -    | -       | -       | -          |
| GB4 + I194T (Novel)       | M74I;N75E;K76T;I194T;A220S;Q271E;R371I             | 7            | 9               | -      | 7                          | 2    | -       | -        | -       | -          | -                            | -     | -      | -      | -    | -       | -       | -          |
| GB4 - N75E (Novel)        | M74I;K76T;A220S;Q271E;R371I                        | 5            | 3               | 13     | 1                          | -    | -       | -        | 2       | -          | 2                            | 8     | 3      | -      | -    | -       | -       | -          |
| GB4 - M74I - N75E (Novel) | K76T;A220S;Q271E;R371I                             | 4            | -               | 1      | -                          | -    | -       | -        | -       | -          | -                            | -     | -      | -      | 1    | -       | -       | -          |
| GB4 - A220S (Novel)       | M74I;N75E;K76T;Q271E;R371I                         | 5            | 2               | 7      | 2                          | -    | -       | -        | -       | -          | 1                            | 3     | -      | -      | -    | -       | 3       | -          |
| Dd2 + T93S (Novel)        | M74I;N75E;K76T;T93S;A220S;Q271E;N326S;I356T;R371I  | 9            | 1               | -      | 1                          | -    | -       | -        | -       | -          | -                            | -     | -      | -      | -    | -       | -       | -          |
| Dd2 + H97L (Novel)        | M74I;N75E;K76T;H97L;A220S;Q271E;N326S;I356T;R371I  | 9            | 7               | -      | 6                          | -    | -       | 1        | -       | -          | -                            | -     | -      | -      | -    | -       | -       | -          |
| Dd2 + H97Y (Novel)        | M74I;N75E;K76T;H97Y;A220S;Q271E;N326S;I356T;R371I  | 9            | 15              | -      | 15                         | -    | -       | -        | -       | -          | -                            | -     | -      | -      | -    | -       | -       | -          |
| Dd2 + F145I (Novel)       | M74I;N75E;K76T;F145I;A220S;Q271E;N326S;I356T;R371I | 9            | -               | -      | -                          | -    | -       | -        | -       | -          | -                            | -     | -      | -      | -    | -       | -       | -          |
| Dd2 + L196P (Novel)       | M74I;N75E;K76T;L196P;A220S;Q271E;N326S;I356T;R371I | 9            | 3               | -      | -                          | -    | -       | 3        | -       | -          | -                            | -     | -      | -      | -    | -       | -       | -          |
| Dd2 + I218F (Novel)       | M74I;N75E;K76T;I218F;A220S;Q271E;N326S;I356T;R371I | 9            | 10              | -      | 10                         | -    | -       | -        | -       | -          | -                            | -     | -      | -      | -    | -       | -       | -          |
| Dd2 + T256I (Novel)       | M74I;N75E;K76T;A220S;T256I;Q271E;N326S;I356T;R371I | 9            | 5               | -      | 5                          | -    | -       | -        | -       | -          | -                            | -     | -      | -      | -    | -       | -       | -          |
| Dd2 + N295I (Novel)       | M74I;N75E;K76T;A220S;Q271E;N295I;N326S;I356T;R371I | 9            | -               | -      | -                          | -    | -       | -        | -       | -          | -                            | -     | -      | -      | -    | -       | -       | -          |
| Dd2 + M343L (Novel)       | M74I;N75E;K76T;A220S;Q271E;N326S;M343L;I356T;R371I | 9            | 3               | -      | 3                          | -    | -       | -        | -       | -          | -                            | -     | -      | -      | -    | -       | -       | -          |
| Dd2 + G353V (Novel)       | M74I;N75E;K76T;A220S;Q271E;N326S;G353V;I356T;R371I | 9            | 8               | -      | 8                          | -    | -       | -        | -       | -          | -                            | -     | -      | -      | -    | -       | -       | -          |
| Dd2 + A366T (Novel)       | M74I;N75E;K76T;A220S;Q271E;N326S;I356T;A366T;R371I | 9            | 2               | -      | 2                          | -    | -       | -        | -       | -          | -                            | -     | -      | -      | -    | -       | -       | -          |
| Dd2 + G367C (Novel)       | M74I;N75E;K76T;A220S;Q271E;N326S;I356T;G367C;R371I | 9            | 2               | -      | 2                          | -    | -       | -        | -       | -          | -                            | -     | -      | -      | -    | -       | -       | -          |
| Dd2 + V370E (Novel)       | M74I;N75E;K76T;A220S;Q271E;N326S;I356T;V370C;R371I | 9            | -               | -      | -                          | -    | -       | -        | -       | -          | -                            | -     | -      | -      | -    | -       | -       | -          |
| Dd2 - N75E (Novel)        | M74I;K76T;A220S;Q271E;N326S;I356T;R371I            | 7            | 2               | -      | 1                          | -    | -       | -        | 1       | -          | -                            | -     | -      | -      | -    | -       | -       | -          |
| Dd2 - A220S (Novel)       | M74I;N75E;K76T;Q271E;N326S;I356T;R371I             | 7            | 3               | -      | 3                          | -    | -       | -        | -       | -          | -                            | -     | -      | -      | -    | -       | -       | -          |
| Cam738 + N75E (Novel)     | M74I;N75E;K76T;L148I;I194T;A220S;Q271E;T333S       | 8            | -               | -      | -                          | -    | -       | -        | -       | -          | -                            | -     | -      | -      | -    | -       | -       | -          |
| Cam783-N75E (Novel)       | M74I;K76T;A220S;Q271E;I356T;R371I                  | 6            | -               | 6      | -                          | -    | -       | -        | -       | -          | 1                            | -     | -      | -      | 2    | -       | 3       | -          |
| Cam783-M74I-N75E (Novel)  | K76T;A220S;Q271E;I356T;R371I                       | 5            | -               | 3      | -                          | -    | -       | -        | -       | -          | -                            | -     | -      | -      | 3    | -       | -       | -          |
| Cam783+V141L (Novel)      | M74I;N75E;K76T;V141L;A220S;Q271E;I356T;R371I       | 8            | -               | -      | -                          | -    | -       | -        | -       | -          | -                            | -     | -      | -      | -    | -       | -       | -          |
|                           |                                                    | Total        | 806             | 783    | 455                        | 65   | 51      | 127      | 77      | 31         | 52                           | 364   | 66     | 147    | 33   | 3       | 71      | 47         |

Samples were collected from the Pf3K data version 3 totaling 806 genomes from Southeast Asia and 783 from Africa that passed our filtering criteria including Cambodian genomes collected in 2012 and 2013 that were more recently deposited by the Pf3K consortium. A dash indicates that the allele was not observed in any genomes from that country. Filtering criteria retained genomes only if the allelic balance for each nucleotide in the pfCRT coding sequence was > 0.4 and in the case of mutant alleles if the alternative coverage was ≥ 5.
