# Supplementary material for: Global Spread of Mutant PfCRT and Its Pleiotropic Impact on Plasmodium falciparum Multidrug Resistance and Fitness
Source: PubMed Central journal article supplement (PMC6495381; doi:10.1128/mbio.02731-18), 2019-04-30
Supplement: mBio.02731-18-st004.pdf [file mBio.02731-18-st004.pdf]

**Supplementary Table S4.** Primers used in this study.

| Primer | Oligonucleotide sequence (5' → 3')                 | Description                 | Lab name |
|--------|----------------------------------------------------|-----------------------------|----------|
| p1     | ccttcgattgtttccttctttaAcatttgataatttaataaccagc     | SDM PfCRT S326N F           | p1765    |
| p2     | GCTGGTTATTAAATTATCACAAATGTTAAAGAAGGAAAACAATGCGAAGG | SDM PfCRT S326N F           | p1766    |
| p3     | GTTAGTTGTATACAAGGTCCAGCAATAGCAATTGCTTATTAC         | SDM PfCRT T356I F           | p5633    |
| p4     | GTAATAAGCAATTGCTATTGCTGGACCTTGTATACAACACTAAC       | SDM PfCRT T356I R           | p5634    |
| p5     | TCAAACATGACAAGGGAAATAGT                            | <i>pfcr</i> t exon 5 F      | p2427    |
| p6     | CCAAGAATAAACATGCGAAACC                             | <i>pfcr</i> t exon 7 R      | p3806    |
| p7     | CTTGAATTTCGACCTTAACAGATGGCTCAC                     | <i>pfcr</i> t exon 2 F      | p3264    |
| p8     | CTTATCGATAAGCAGAAGAACATATTAATAGGAATACTTAATTG       | <i>pfcr</i> t exon 3 R      | p3265    |
| p9     | CTTGGGCCCAAGTTGTAAGTCTTCTAAGC                      | <i>pfcr</i> t gDNA 5' UTR F | p3404    |
| p10    | CTCGAGATGGTTGGTTCGCTAAACTGC                        | <i>hDHFR</i> F              | p3315    |
| p11    | TTGACCCTTATATATTCCACCCA                            | <i>pfcr</i> t gDNA 3' UTR R | p3403    |
| p12    | GAGGCGCCTATTTCAAAAATCTTAGCATAAGGATT                | <i>pbcr</i> t 3' UTR R      | p1644    |

SDM, site-directed mutagenesis; F, forward; R, reverse; gDNA, genomic DNA; *pbcr*t, *P. berghei* chloroquine resistance transporter; UTR, untranslated region.
