# Supplementary material for: Global Spread of Mutant PfCRT and Its Pleiotropic Impact on Plasmodium falciparum Multidrug Resistance and Fitness
Source: PubMed Central journal article supplement (PMC6495381; doi:10.1128/mbio.02731-18), 2019-04-30
Supplement: mBio.02731-18-st005.pdf [file mBio.02731-18-st005.pdf]

**Supplementary Table S5 (page 1 of 2).** Antimalarial IC<sub>50</sub> and IC<sub>90</sub> values of *pfcr*-modified parasite lines.

|                               | Dd2 <sup>Dd2</sup> | Dd2 <sup>Cam783</sup> | Dd2 <sup>FCB</sup> | Dd2 <sup>GB4</sup> | Dd2 <sup>3D7</sup> | Dd2 <sup>R539T</sup> <sup>Dd2</sup> | Dd2 <sup>R539T</sup> <sup>Cam783</sup> | Dd2 <sup>R539T</sup> <sup>FCB</sup> | Dd2 <sup>R539T</sup> <sup>GB4</sup> | Dd2 <sup>R539T</sup> <sup>3D7</sup> |
|-------------------------------|--------------------|-----------------------|--------------------|--------------------|--------------------|-------------------------------------|----------------------------------------|-------------------------------------|-------------------------------------|-------------------------------------|
| <b>CQ IC<sub>50</sub></b>     | 161 ± 10.1         | 134 ± 10.5            | 144 ± 10.1         | 102 ± 10.8         | 12.1 ± 0.4         | 152 ± 10.8                          | 131 ± 14.6                             | 132 ± 12.9                          | 92.5 ± 8.8                          | 12.9 ± 0.5                          |
| <i>n</i>                      | 7                  | 7                     | 5                  | 4                  | 6                  | 7                                   | 6                                      | 5                                   | 4                                   | 7                                   |
| <i>P</i>                      | –                  | 0.05                  | 0.27               | 0.01               | 0.0012             | –                                   | 0.23                                   | 0.27                                | 0.0061                              | 0.0006                              |
| <b>CQ IC<sub>90</sub></b>     | 261 ± 12.0         | 231 ± 9.9             | 268 ± 27.6         | 204 ± 18.1         | 18.4 ± 1.9         | 277 ± 24.4                          | 255 ± 17.8                             | 263 ± 26.9                          | 199 ± 13.3                          | 24.9 ± 0.7                          |
| <i>n</i>                      | 7                  | 7                     | 5                  | 4                  | 6                  | 7                                   | 6                                      | 5                                   | 4                                   | 7                                   |
| <i>P</i>                      | –                  | 0.10                  | 0.64               | 0.01               | 0.0012             | –                                   | 0.18                                   | 0.2                                 | 0.0061                              | 0.0006                              |
| <b>CQ+VP IC<sub>50</sub></b>  | 32.5 ± 4.1         | 26.6 ± 4.6            | 22.5 ± 5.8         | 30.7 ± 8.9         | 12.9 ± 0.6         | 23.8 ± 6.1                          | 26.6 ± 4.7                             | 19.0 ± 6.8                          | 23.9 ± 4.7                          | 13.2 ± 0.6                          |
| <i>n</i>                      | 6                  | 6                     | 5                  | 3                  | 5                  | 6                                   | 5                                      | 5                                   | 3                                   | 6                                   |
| <i>P</i>                      | –                  | 0.70                  | 0.25               | 0.55               | 0.0043             | –                                   | 0.54                                   | 0.66                                | 0.71                                | 0.13                                |
| <b>CQ+VP IC<sub>90</sub></b>  | 80.2 ± 7.2         | 62.3 ± 0.9            | 79.5 ± 8.7         | 66.6 ± 11.6        | 24.4 ± 2.4         | 78.8 ± 13.2                         | 72.1 ± 12.8                            | 71.7 ± 13.8                         | 59.3 ± 8.11                         | 26.4 ± 1.1                          |
| <i>n</i>                      | 6                  | 5                     | 5                  | 3                  | 5                  | 6                                   | 5                                      | 5                                   | 3                                   | 6                                   |
| <i>P</i>                      | –                  | 0.33                  | 0.93               | 0.55               | 0.0043             | –                                   | 0.54                                   | 0.43                                | 0.71                                | 0.0022                              |
| <b>% Reversibility CQ</b>     | 0.79 ± 0.02        | 0.79 ± 0.04           | 0.84 ± 0.04        | 0.70 ± 0.07        | -0.08 ± 0.07       | 0.84 ± 0.03                         | 0.78 ± 0.04                            | 0.86 ± 0.04                         | 0.74 ± 0.03                         | -0.03 ± 0.07                        |
| <i>n</i>                      | 6                  | 6                     | 5                  | 3                  | 5                  | 6                                   | 5                                      | 5                                   | 3                                   | 6                                   |
| <i>P</i>                      | –                  | 0.97                  | 0.35               | 0.33               | 0.0043             | –                                   | 0.27                                   | 0.71                                | 0.19                                | 0.0022                              |
| <b>md-CQ IC<sub>50</sub></b>  | 845 ± 44           | 703 ± 80              | 744 ± 69           | 537 ± 66           | 21.2 ± 0.8         | 720 ± 29                            | 608 ± 56                               | 602 ± 47                            | 426 ± 53                            | 21.0 ± 2.4                          |
| <i>n</i>                      | 7                  | 7                     | 5                  | 4                  | 7                  | 7                                   | 6                                      | 5                                   | 4                                   | 6                                   |
| <i>P</i>                      | –                  | 0.05                  | 0.07               | 0.0061             | 0.0006             | –                                   | 0.14                                   | 0.07                                | 0.0061                              | 0.0012                              |
| <b>md-CQ IC<sub>90</sub></b>  | 1527 ± 68          | 1309 ± 83             | 1428 ± 58          | 828 ± 74           | 48.3 ± 1.7         | 1334 ± 134                          | 1144 ± 137                             | 1186 ± 109                          | 742 ± 103                           | 48.1 ± 3.3                          |
| <i>n</i>                      | 7                  | 7                     | 5                  | 4                  | 7                  | 7                                   | 6                                      | 5                                   | 4                                   | 6                                   |
| <i>P</i>                      | –                  | 0.13                  | 0.53               | 0.0061             | 0.0006             | –                                   | 0.45                                   | 0.43                                | 0.01                                | 0.0012                              |
| <b>md-ADQ IC<sub>50</sub></b> | 90.7 ± 6.2         | 45.3 ± 2.9            | 71.5 ± 7.7         | 44.4 ± 6.8         | 23.7 ± 1.7         | 79.1 ± 3.8                          | 46.5 ± 2.2                             | 69.5 ± 2.2                          | 43.5 ± 5.8                          | 27.1 ± 1.9                          |
| <i>n</i>                      | 7                  | 7                     | 5                  | 4                  | 7                  | 7                                   | 6                                      | 5                                   | 4                                   | 6                                   |
| <i>P</i>                      | –                  | 0.0006                | 0.11               | 0.0061             | 0.0006             | –                                   | 0.0012                                 | 0.11                                | 0.0061                              | 0.0012                              |
| <b>md-ADQ IC<sub>90</sub></b> | 163 ± 8.7          | 88.9 ± 4.6            | 117 ± 13.8         | 79.7 ± 8.5         | 37.7 ± 2.7         | 131 ± 11.3                          | 80.2 ± 6.6                             | 122 ± 9.9                           | 64.1 ± 12.3                         | 36.7 ± 3.2                          |
| <i>n</i>                      | 7                  | 6                     | 5                  | 3                  | 6                  | 7                                   | 6                                      | 5                                   | 3                                   | 6                                   |
| <i>P</i>                      | –                  | 0.0012                | 0.03               | 0.02               | 0.0012             | –                                   | 0.01                                   | 0.43                                | 0.03                                | 0.0012                              |
| <b>LMF IC<sub>50</sub></b>    | 1.1 ± 0.1          | 1.2 ± 0.2             | 1.0 ± 0.04         | 1.6 ± 0.5          | 2.0 ± 0.2          | 1.0 ± 0.2                           | 1.2 ± 0.2                              | 1.1 ± 0.2                           | 1.1 ± 0.04                          | 1.9 ± 0.4                           |
| <i>n</i>                      | 4                  | 7                     | 4                  | 3                  | 6                  | 4                                   | 4                                      | 4                                   | 3                                   | 4                                   |
| <i>P</i>                      | –                  | 0.34                  | 0.86               | 0.40               | 0.0095             | –                                   | 0.49                                   | 0.89                                | 0.86                                | 0.20                                |
| <b>LMF IC<sub>90</sub></b>    | 11.2 ± 1.1         | 8.9 ± 1.1             | 13.2 ± 1.3         | 16.0 ± 5.6         | 12.2 ± 1.2         | 9.1 ± 1.4                           | 8.7 ± 1.4                              | 7.0 ± 0.6                           | 12.0 ± 7.1                          | 9.2 ± 0.7                           |
| <i>n</i>                      | 4                  | 7                     | 4                  | 3                  | 6                  | 4                                   | 4                                      | 4                                   | 3                                   | 4                                   |
| <i>P</i>                      | –                  | 0.23                  | 0.20               | 0.63               | 0.61               | –                                   | 0.89                                   | 0.34                                | >0.99                               | 0.89                                |

**Supplementary Table S5 (page 2 of 2).** Antimalarial IC<sub>50</sub> and IC<sub>90</sub> values of *pfcr*-modified parasite lines.

|                            |            |            |            |            |            |             |            |            |            |            |
|----------------------------|------------|------------|------------|------------|------------|-------------|------------|------------|------------|------------|
| <b>AS IC<sub>50</sub></b>  | 2.3 ± 0.2  | 2.2 ± 0.3  | 2.5 ± 0.2  | 1.8 ± 0.2  | 2.3 ± 0.2  | 2.3 ± 0.3   | 2.5 ± 0.3  | 2.2 ± 0.2  | 1.7 ± 0.3  | 3.0 ± 0.2  |
| <i>n</i>                   | 7          | 9          | 6          | 5          | 10         | 7           | 6          | 6          | 5          | 6          |
| <i>P</i>                   | –          | 0.84       | 0.29       | 0.26       | 0.83       | –           | 0.54       | 0.83       | 0.43       | 0.1        |
| <b>AS IC<sub>90</sub></b>  | 4.1 ± 0.3  | 4.7 ± 0.6  | 5.5 ± 0.7  | 4.2 ± 0.8  | 4.9 ± 0.5  | 4.6 ± 0.6   | 4.9 ± 0.6  | 5.0 ± 0.6  | 3.7 ± 1.0  | 5.7 ± 0.9  |
| <i>n</i>                   | 7          | 7          | 6          | 3          | 8          | 7           | 6          | 6          | 3          | 7          |
| <i>P</i>                   | –          | 0.38       | 0.05       | >0.99      | 0.19       | –           | 0.63       | 0.63       | 0.67       | 0.26       |
| <b>PPQ IC<sub>50</sub></b> | 13.8 ± 0.9 | 12.4 ± 0.9 | 13.5 ± 1.0 | 14.7 ± 1.3 | 10.9 ± 1.3 | 11.8 ± 0.6  | 10.1 ± 0.6 | 9.9 ± 1.0  | 8.5 ± 0.4  | 15.7 ± 2.1 |
| <i>n</i>                   | 6          | 7          | 5          | 4          | 8          | 5           | 5          | 5          | 5          | 5          |
| <i>P</i>                   | –          | 0.38       | >0.99      | 0.71       | 0.05       | –           | 0.15       | 0.22       | 0.0079     | 0.15       |
| <b>PPQ IC<sub>90</sub></b> | 29.7 ± 2.2 | 24.4 ± 2.9 | 29.0 ± 1.0 | 29.4 ± 5.0 | 22.1 ± 3.2 | 23.2 ± 3.4  | 19.8 ± 2.2 | 21.4 ± 3.1 | 17.1 ± 2.0 | 34.7 ± 5.4 |
| <i>n</i>                   | 6          | 7          | 5          | 4          | 8          | 5           | 5          | 5          | 5          | 5          |
| <i>P</i>                   | –          | 0.23       | 0.30       | 0.44       | 0.04       | –           | 0.69       | 0.55       | 0.22       | 0.55       |
| <b>QN IC<sub>50</sub></b>  | 139 ± 22.5 | 134 ± 21.1 | 118 ± 15.6 | 128 ± 19.7 | 96.9 ± 8.2 | 98.1 ± 16.2 | 120 ± 15.0 | 103 ± 8.6  | 126 ± 43.0 | 83.7 ± 6.6 |
| <i>n</i>                   | 4          | 7          | 5          | 4          | 6          | 4           | 4          | 4          | 4          | 4          |
| <i>P</i>                   | –          | 0.79       | 0.56       | 0.69       | 0.17       | –           | 0.34       | 0.89       | 0.89       | 0.89       |
| <b>QN IC<sub>90</sub></b>  | 355 ± 19   | 393 ± 58   | 363 ± 4    | 587 ± 169  | 318 ± 68   | 390 ± 25    | 436 ± 50   | 408 ± 59   | 399 ± 96   | 296 ± 42   |
| <i>n</i>                   | 4          | 7          | 5          | 4          | 6          | 4           | 4          | 4          | 4          | 4          |
| <i>P</i>                   | –          | 0.93       | 0.91       | 0.89       | 0.48       | –           | 0.69       | 0.89       | 0.69       | 0.11       |
| <b>PND IC<sub>50</sub></b> | 11.7 ± 2.1 | 10.8 ± 1.0 | 12.6 ± 1.5 | 10.2 ± 1.1 | 9.3 ± 1.6  | 11.8 ± 1.5  | 14.2 ± 1.3 | 13.6 ± 1.8 | 8.2 ± 3.0  | 14.0 ± 1.9 |
| <i>n</i>                   | 5          | 6          | 5          | 3          | 7          | 5           | 4          | 5          | 3          | 5          |
| <i>P</i>                   | –          | 0.93       | 0.84       | >0.99      | 0.43       | –           | 0.41       | 0.55       | 0.39       | 0.42       |
| <b>PND IC<sub>90</sub></b> | 19.5 ± 4.1 | 17.0 ± 0.5 | 21.7 ± 3.5 | 17.8 ± 0.7 | 13.9 ± 2.4 | 20.1 ± 3.1  | 21.7 ± 4.0 | 21.0 ± 3.3 | 14.5 ± 5.6 | 19.3 ± 3.2 |
| <i>n</i>                   | 5          | 6          | 5          | 3          | 7          | 5           | 4          | 5          | 3          | 5          |
| <i>P</i>                   | –          | 0.93       | 0.69       | >0.99      | 0.43       | –           | 0.56       | 0.69       | 0.86       | 0.93       |

IC<sub>50</sub> and IC<sub>90</sub> values (nM) indicate the mean ± SEM, as determined in 3 to 10 independent assays. CQ, chloroquine; VP, verapamil; md-CQ, monodesethyl-chloroquine; md-ADQ, monodesethyl-amodiaquine; LMF, lumefantrine; AS, artesunate; PPQ, piperazine; QN, quinine; PND, pyronaridine; *n*, number of assays. CQ + VP assays were performed with 0.8 μM VP. Statistical significance was determined via two-tailed Mann Whitney *U* test. *P* values are reported for comparisons with the parasite line Dd2<sup>Dd2</sup> (left side) or Dd2<sup>R539T</sup> (right side).

Color code:            ns            \*p<0.05    \*\*p<0.01    \*\*\*p<0.001
