# Supplementary material for: Global Spread of Mutant PfCRT and Its Pleiotropic Impact on Plasmodium falciparum Multidrug Resistance and Fitness
Source: PubMed Central journal article supplement (PMC6495381; doi:10.1128/mbio.02731-18), 2019-04-30
Supplement: mBio.02731-18-st006.pdf [file mBio.02731-18-st006.pdf]

**Supplementary Table S6.** *In vitro* growth selection coefficients of *pfcr*-modified and reference parasite lines.

| Line                  | Dd2 parent                  | Dd2 <sup>Dd2</sup>                  | Dd2 <sup>Cam783</sup>                  | Dd2 <sup>FCB</sup>                  | Dd2 <sup>GB4</sup>                  | Dd2 <sup>3D7</sup>                  |
|-----------------------|-----------------------------|-------------------------------------|----------------------------------------|-------------------------------------|-------------------------------------|-------------------------------------|
| s                     | -0.12 ± 0.007               | -0.16 ± 0.007                       | -0.04 ± 0.011                          | -0.20 ± 0.009                       | -0.08 ± 0.014                       | 0.00 ± 0.012                        |
| <i>P</i> <sub>1</sub> | <0.0001                     | <0.0001                             | 0.03                                   | <0.0001                             | <0.0001                             | –                                   |
| Line                  | Dd2 <sub>R539T</sub> parent | Dd2 <sub>R539T</sub> <sup>Dd2</sup> | Dd2 <sub>R539T</sub> <sup>Cam783</sup> | Dd2 <sub>R539T</sub> <sup>FCB</sup> | Dd2 <sub>R539T</sub> <sup>GB4</sup> | Dd2 <sub>R539T</sub> <sup>3D7</sup> |
| s                     | -0.24 ± 0.007               | -0.24 ± 0.006                       | -0.09 ± 0.010                          | -0.22 ± 0.006                       | -0.07 ± 0.01                        | -0.05 ± 0.01                        |
| <i>P</i> <sub>1</sub> | <0.0001                     | <0.0001                             | 0.01                                   | <0.0001                             | 0.54                                | –                                   |
| <i>P</i> <sub>2</sub> | <0.0001                     | <0.0001                             | 0.002                                  | 0.57                                | 0.96                                | <0.0001                             |

Growth selection coefficients (s) of recombinant and parental parasite lines were determined as detailed in **Supplementary Materials and Methods**, and were normalized against the Dd2<sup>3D7</sup> line that expresses the wild-type (3D7) *pfcr* allele.  $s < 0$  and  $s > 0$  indicate growth inferior or superior to the Dd2<sup>3D7</sup> line, respectively. Listed are mean  $s \pm$  SEM values, which encompass three independent experiments performed in duplicate ( $n=6$  total replicates per line). Statistical comparisons were done using a two-way ANOVA with Sidak's post-hoc test. *P* indicates the statistical significance for *pfcr*-variant lines as compared to otherwise isogenic parasites encoding 3D7 *pfcr* (either Dd2<sup>3D7</sup> or Dd2<sub>R539T</sub><sup>3D7</sup>). *P*<sub>2</sub> indicates the statistical significance observed between *pfcr*-matched lines in the Dd2 (wild-type K13) and Dd2<sub>R539T</sub> (mutant K13) genetic backgrounds.

Color code      ns      \* $p < 0.05$       \*\* $p < 0.01$       \*\*\* $p < 0.001$
